# Supplementary material
Source: MDPI journal article supplement (https://www.mdpi.com/1424-2818/15/8/933)
Supplement: s1 [file s1]

**Table S1.** Comprehensive list of the megabenthic species identified in this study, with their abundance values, occurrence, depth range, and protection status. \* indicates structuring species. BC, Barcelona Convention; HD, European Community Habitat Directive.

| Phylum   | Subgroup     | Species                                | Total nº of specimens | Occupancy (%) | Depth range (m) | Protection status |
|----------|--------------|----------------------------------------|-----------------------|---------------|-----------------|-------------------|
| Porifera | Demospongiae | <i>Acanthella acuta</i>                | 1                     | 0.3           | 59-60           |                   |
|          |              | <i>Agelas oroides</i>                  | 3                     | 0.5           | 62-81           |                   |
|          |              | <i>Aplysina cavernicola</i>            | 357                   | 7.9           | 56-75           | Annex II BC       |
|          |              | <i>Axinella polypoides</i> *           | 2                     | 0.5           | 75-77           | Annex II BC       |
|          |              | <i>Axinella</i> spp.                   | 1897                  | 29.0          | 55-98           |                   |
|          |              | <i>Chondrosia reniformis</i>           | 17                    | 1.5           | 62-81           |                   |
|          |              | <i>Crella</i> sp.                      | 6                     | 0.8           | 63-91           |                   |
|          |              | <i>Dysidea</i> sp.                     | 11                    | 1.5           | 75-77           |                   |
|          |              | <i>Haliclona poecillastroides</i>      | 14                    | 1.5           | 55-77           |                   |
|          |              | <i>Haliclona</i> sp. 1                 | 1                     | 0.3           | 65-66           |                   |
|          |              | <i>Haliclona</i> sp. 2                 | 21                    | 0.8           | 66-67           |                   |
|          |              | <i>Haliclona</i> sp. 3                 | 23                    | 3.8           | 61-98           |                   |
|          |              | <i>Hexadella racovitzai</i>            | 39                    | 6.4           | 57-91           |                   |
|          |              | <i>Ircinia</i> sp.                     | 2                     | 0.3           | 99-101          |                   |
|          |              | <i>Keratosia</i> sp. 1                 | 44                    | 4.9           | 59-73           |                   |
|          |              | <i>Keratosia</i> sp. 3                 | 9                     | 1.5           | 55-76           |                   |
|          |              | <i>Keratosia</i> sp. 4                 | 2                     | 0.5           | 74-75           |                   |
|          |              | <i>Raspailia (raspailia) viminalis</i> | 6                     | 0.5           | 80-81           |                   |
|          |              | <i>Sarcotragus foetidus</i> *          | 57                    | 4.9           | 55-98           | Annex II BC       |
|          |              | <i>Spongia lamella</i> *               | 20                    | 3.6           | 75-98           | Annex III BC      |
|          |              | <i>Tethya citrina</i>                  | 1                     | 0.3           | 90-91           |                   |
|          |              | Porifera sp. 3                         | 5                     | 1.0           | 62-69           |                   |
|          |              | Porifera sp. 5                         | 19                    | 2.8           | 57-98           |                   |
|          |              | Porifera sp. 17                        | 1                     | 0.3           | 78-94           |                   |
|          |              | Porifera sp. 19                        | 27                    | 4.4           | 57-81           |                   |
|          |              | Porifera sp. 24                        | 1                     | 0.3           | 72-73           |                   |
|          |              | Porifera sp. 45                        | 19                    | 4.6           | 61-90           |                   |
|          |              | Porifera sp. 46                        | 5                     | 0.8           | 62-72           |                   |
|          |              | Porifera sp. 47                        | 4                     | 0.5           | 62-69           |                   |
|          |              | Porifera sp. 54                        | 2                     | 0.3           | 103-104         |                   |
|          |              | Porifera sp. 57                        | 14                    | 2.8           | 97-98           |                   |

|          |                  |                                    |      |      |         |                                                               |
|----------|------------------|------------------------------------|------|------|---------|---------------------------------------------------------------|
|          |                  | Porifera sp. 58                    | 3    | 0.5  | 75-76   |                                                               |
|          | Homoscleromorpha | <i>Oscarella</i> spp.              | 2    | 0.5  | 99-101  |                                                               |
| Cnidaria | Anthozoa         | <i>Alcyonium acaule</i>            | 93   | 6.4  | 57-92   |                                                               |
|          |                  | <i>Alcyonium coralloides</i>       | 358  | 10.3 | 55-71   |                                                               |
|          |                  | <i>Alcyonium palmatum</i> *        | 49   | 9.5  | 74-104  |                                                               |
|          |                  | <i>Antipathella subpinnata</i> *   | 34   | 2.8  | 61-69   | Annex II & III BC;<br>Annex II CITES;<br>IUCN Near Threatened |
|          |                  | <i>Caryophyllia</i> spp.           | 1    | 0.3  | 78-79   |                                                               |
|          |                  | <i>Cerianthus membranaceus</i>     | 16   | 4.6  | 59-99   |                                                               |
|          |                  | <i>Eunicella cavolini</i> *        | 3329 | 22.8 | 55-78   | IUCN Near Threatened                                          |
|          |                  | <i>Eunicella verrucosa</i> *       | 185  | 22.1 | 55-90   | IUCN Vulnerable                                               |
|          |                  | <i>Funiculina quadrangularis</i> * | 2    | 0.5  | 103-104 | IUCN Vulnerable                                               |
|          |                  | <i>Leptogorgia sarmentosa</i> *    | 6    | 1.5  | 63-98   |                                                               |
|          |                  | <i>Pachyceriathus solitarius</i>   | 1    | 0.3  | 98-99   |                                                               |
|          |                  | <i>Paramuricea clavata</i> *       | 207  | 9.7  | 55-78   | IUCN Vulnerable                                               |
|          |                  | <i>Parazoanthus axinellae</i>      | 1233 | 22.6 | 55-91   |                                                               |
|          |                  | <i>Pennatula phosphorea</i> *      | 5    | 1.0  | 84-103  | IUCN Vulnerable                                               |
|          |                  | <i>Pennatula rubra</i> *           | 4    | 1.0  | 97-99   | IUCN Vulnerable                                               |
|          |                  | <i>Scleractinia</i> sp. 2          | 8    | 1.3  | 59-75   |                                                               |
|          |                  | <i>Veretillum cynomorium</i> *     | 2    | 0.5  | 100-101 |                                                               |
|          | Hydrozoa         | <i>Eudendrium</i> sp.              | 29   | 3.3  | 61-91   |                                                               |
|          |                  | <i>Lytocarpia myriophyllum</i> *   | 1231 | 36.7 | 61-101  |                                                               |
|          |                  | <i>Nemertesia antennina</i>        | 4    | 0.5  | 90-91   |                                                               |
|          |                  | Hydrozoa sp. 1                     | 44   | 4.6  | 63-104  |                                                               |
|          |                  | Hydrozoa sp. 2                     | 17   | 0.8  | 59-91   |                                                               |
| Annelida | Echiuroidea      | <i>Bonellia viridis</i>            | 49   | 7.9  | 55-104  |                                                               |
|          | Sabellida        | <i>Acromegalomma</i> sp.           | 1    | 0.3  | 86-87   |                                                               |
|          |                  | <i>Apomatus/Protula</i> complex    | 21   | 4.6  | 65-92   |                                                               |
|          |                  | <i>Filograna/Salmacina</i> complex | 465  | 25.4 | 60-91   |                                                               |
|          |                  | <i>Myxicola</i> sp.                | 14   | 3.1  | 63-95   |                                                               |
|          |                  | <i>Sabella spallanzanii</i>        | 11   | 2.3  | 66-76   |                                                               |

|               |              |                                                      |     |      |         |                                      |
|---------------|--------------|------------------------------------------------------|-----|------|---------|--------------------------------------|
|               |              | <i>Sabella</i> sp.                                   | 7   | 1.3  | 67-74   |                                      |
|               |              | Sabellidae                                           | 37  | 5.1  | 102-104 |                                      |
|               |              | Serpulidae                                           | 10  | 2.1  | 64-101  |                                      |
| Mollusca      | Bivalvia     | <i>Neopycnodonte cochlear</i>                        | 18  | 0.5  | 99-101  |                                      |
|               |              | <i>Pteria hirundo</i>                                | 2   | 0.5  | 60-61   |                                      |
|               | Gastropoda   | <i>Felimare</i> sp.                                  | 2   | 0.5  | 62-86   |                                      |
|               |              | <i>Flabellina</i> sp.                                | 6   | 0.5  | 71-79   |                                      |
|               |              | Muricidae                                            | 1   | 0.3  | 85-86   |                                      |
|               |              | Trochoidea                                           | 2   | 0.3  | 77-80   |                                      |
|               |              | Vetigastropoda                                       | 1   | 0.3  | 76-77   |                                      |
| Arthropoda    | Crustacea    | <i>Ethusa mascarone</i>                              | 1   | 0.3  | 103-104 |                                      |
|               |              | <i>Munida</i> sp.                                    | 2   | 0.5  | 80-81   |                                      |
|               |              | Paguridae                                            | 2   | 0.5  | 73-86   |                                      |
|               |              | <i>Palinurus elephas</i>                             | 1   | 0.3  | 65-66   | Annex III BC;<br>IUCN Vulnerable     |
|               |              | <i>Scyllarus arctus</i>                              | 1   | 0.3  | 96-97   | Annex III BC;<br>IUCN Data Deficient |
| Bryozoa       | Gymnolaemata | <i>Adeonella calveti</i>                             | 1   | 0.3  | 60-69   |                                      |
|               |              | <i>Pentapora</i> sp.*                                | 609 | 20.5 | 57-101  |                                      |
|               |              | <i>Reteporella</i> spp.                              | 106 | 14.9 | 57-91   |                                      |
|               |              | <i>Smittina cervicornis</i>                          | 163 | 17.4 | 57-91   |                                      |
|               |              | <i>Turbicellepora</i> sp.                            | 67  | 9.2  | 55-74   |                                      |
|               | Stenolaemata | <i>Fron dipora verrucosa</i>                         | 8   | 2.1  | 60-73   |                                      |
| Echinodermata | Asteroidea   | <i>Echinaster sepositus</i>                          | 11  | 2.6  | 55-84   |                                      |
|               |              | <i>Hacelia attenuata</i>                             | 8   | 1.8  | 60-71   |                                      |
|               | Crinoidea    | <i>Leptometra phalangium</i>                         | 5   | 0.5  | 94-99   |                                      |
|               | Echinoidea   | <i>Centrostephanus longispinus</i>                   | 3   | 0.8  | 65-76   | Annex II BC;<br>Annex IV HD          |
|               |              | <i>Cidaris cidaris</i> / <i>Stylocidaris affinis</i> | 15  | 2.6  | 55-90   |                                      |

|          |                 |                                   |     |      |        |
|----------|-----------------|-----------------------------------|-----|------|--------|
|          | Holothuroidea   | <i>Holothuria forskali</i>        | 6   | 0.8  | 60-70  |
|          |                 | <i>Holothuria poli</i>            | 169 | 11.5 | 59-104 |
|          |                 | <i>Holothuria tubulosa</i>        | 8   | 1.3  | 61-91  |
|          |                 | <i>Parastichopus regalis</i>      | 10  | 2.3  | 79-104 |
|          | Ophiuroidea     | <i>Amphiura</i> sp.               | 6   | 0.8  | 75-91  |
|          |                 | <i>Astrospartus mediterraneus</i> | 132 | 10.8 | 55-70  |
| Chordata | Aplousobranchia | <i>Diazona violacea</i>           | 1   | 0.3  | 91-92  |
|          | Phlebobranchia  | <i>Ciona</i> sp.                  | 2   | 0.5  | 78-80  |
|          | Stolidobranchia | <i>Halocynthia papillosa</i>      | 3   | 0.8  | 57-67  |
